# Supplementary material
Source: PubMed Central journal article supplement (PMC3086276)
Supplement: NIHMS35097-supplement-01.pdf [file NIHMS35097-supplement-01.pdf]

# Equol-stimulated mitochondrial reactive oxygen species activate eNOS and redox signaling in endothelial cells: Roles for F-actin and GPR30

David J. Rowlands<sup>†</sup>, Sarah Chapple<sup>†</sup>, Richard C.M. Siow, and Giovanni E Mann\*

Cardiovascular Division, British Heart Foundation Centre of Research Excellence, School of Medicine, King's College London, 150 Stamford Street, London SE1 9NH, U.K.

<sup>†</sup>Contributed equally to this work

## Address correspondence to:

Prof G.E. Mann, Cardiovascular Division, BHF Centre of Research Excellence, School of Medicine, King's College London, 150 Stamford Street, London SE1 9NH, UK

Email: [giovanni.mann@kcl.ac.uk](mailto:giovanni.mann@kcl.ac.uk)

## Online Data Supplement - Extended Materials and Methods

### Materials

Equol was from Apin Chemicals Ltd (UK); MnTMPyP and AG1478 from Calbiochem (USA); L-NAME, IBMX, SOD, PEG-SOD, PEG-CAT, rotenone and pertussis toxin from Sigma-Aldrich (UK). Monoclonal antibodies against eNOS and secondary antibodies were from Santa Cruz Biotechnology (USA),  $\alpha$ -tubulin from Chemicon (USA), antibodies against eNOS-Ser1177, dually phosphorylated (threonine 183 and tyrosine 185) ERK1/2 and Akt-Ser473 from Cell Signaling (UK). ECL reagent was from Amersham (UK); MitoSox Red from Invitrogen Molecular Probes (USA); Rhodamine-phalloidin and Hoechst reagent from Fluka (UK); cGMP ELISA from Cayman Chemicals (USA).

### Human Umbilical Vein Endothelial Cell Culture

Umbilical cords were obtained with informed patient consent and approval from the St. Thomas' Hospital Ethics Research Committee. All experiments were performed with passage 3 HUVEC, and an endothelial phenotype was confirmed by a characteristic cobblestone morphology and positive immunostaining for von Willebrand factor (data not shown).<sup>1-3</sup>

### Immunoblotting

HUVEC (passage 3) were equilibrated in low serum (1% FCS) M199, preincubated in Krebs buffer containing L-arginine (100 $\mu$ M) for 30 min and then treated for 2 min with equol (100nmol/L) or vehicle (0.01% DMSO). In other experiments, cells were pretreated for 30 min in the absence or presence of SOD (200U/mL), PSOD (50U/mL), PCAT (200U/mL), rotenone (2 $\mu$ mol/L), pertussis toxin (100ng/mL), AG-1478 (5 $\mu$ mol/L, EGFR tyrosine kinase inhibitor) or 4-amino-5-(4-chlorophenyl)-7-(*t*-butyl) pyrazolo [3,4-*d*] pyrimidine (10 $\mu$ mol/L, PP2, c-Src kinase inhibitor) and then challenged acutely for 2 min with equol (100nmol/L). Reactions were stopped with ice-cold PBS, cell lysates separated by SDS-PAGE, probed with specific antibodies, protein bands detected by ECL and densitometric analyses performed using Image J software (National Institute of Health, USA).<sup>2</sup>

### Quantitative RT-PCR

HUVEC were stimulated with equol (100 nmol/L) for 6h, cells lysed and RNA purified using the Macherey-Nagel RNA isolation kit, quantified and reverse-transcribed using a QuantiTect RT kit (Qiagen).<sup>4</sup> eNOS gene expression was analyzed using a quantitative RT-PCR system (Corbett Rotor-gene) and mRNA levels were normalized to the geometric mean of three stable reference genes (ribosomal protein L13a (RPL13A), succinate dehydrogenase (SDHA),  $\beta$ 2-microglobulin ( $\beta$ 2M)).<sup>5,6</sup> Primer sequences were:

eNOS: 5'-GCATCACCAGGAAGAAGACCT-3' and 5'-TTCACCTCGCTTCGCCACAC-3'

RPL13A: 5'-GAGGCCCTACCACTTCC-3' and 5'-AACACCTTGAGACGGTCCAG-3'

SDHA: 5'-AGAAGCCCTTTGAGGAGCA-3' and 5'-CGATTACGGGTCTATATCCAGA-3'

$\beta$ 2M: 5'-TTCTGGCCTGGAGGCTATC-3' and 5'-TCAGGAAATTTGACTTTCCATTC-3'

### Intracellular cGMP Accumulation as an Index of NO Production

Confluent cell monolayers were preincubated for 30min with Krebs buffer containing L-arginine (100 $\mu$ mol/L) and the phosphodiesterase inhibitor isobutylmethylxanthine (IBMX, 0.5 mmol/L) in the absence or presence of L-NAME (100 $\mu$ mol/L) or rotenone (2 $\mu$ mol/L).<sup>1-3</sup> Cells were then stimulated acutely for 2min with equol (100nM) or vehicle (Veh, 0.01% DMSO) in the presence of IBMX (0.5mM) and L-arginine (100 $\mu$ mol/L) and continued absence or presence of L-NAME (100 $\mu$ mol/L) or rotenone (2 $\mu$ mol/L). Basal and stimulated intracellular cGMP levels were determined by ELISA, with inhibition of cGMP accumulation by L-NAME serving as an index of NO production.<sup>1-3</sup>

### References

1. Wyatt AW, Steinert JR, Wheeler-Jones CP, Morgan AJ, Sugden D, Pearson JD, Sobrevia L, Mann GE. Early activation of the p42/p44MAPK pathway mediates adenosine-induced nitric oxide production in human endothelial cells: a novel calcium-insensitive mechanism. *FASEB J*. 2002;16:1584-1594.
2. Joy S, Siow RC, Rowlands DJ, Becker M, Wyatt AW, Aaronson PI, Coen CW, Kallo I, Jacob R, Mann GE. The isoflavone Equol mediates rapid vascular relaxation: Ca<sup>2+</sup>-independent activation of endothelial nitric-oxide synthase/Hsp90 involving ERK1/2 and Akt phosphorylation in human endothelial cells. *J Biol Chem*. 2006;281:27335-27345.
3. Queen LR, Ji Y, Xu B, Young L, Yao K, Wyatt AW, Rowlands DJ, Siow RC, Mann GE, Ferro A. Mechanisms underlying beta2-adrenoceptor-mediated nitric oxide generation by human umbilical vein endothelial cells. *J Physiol*. 2006;576:585-594.
4. He M, Siow RC, Sugden D, Gao L, Cheng X, Mann GE. Induction of HO-1 and redox signaling in endothelial cells by advanced glycation end products: A role for Nrf2 in vascular protection in diabetes. *Nutr Metab Cardiovasc Dis*. in press, doi.org/10.1016/j.numecd.2009.12.008.
5. Vandesompele J, De PK, Pattyn F, Poppe B, Van RN, De PA, Speleman F. Accurate normalization of real-time quantitative RT-PCR data by geometric averaging of multiple internal control genes. *Genome Biol*. 2002;3:RESEARCH0034.
6. Bustin SA, Benes V, Garson JA, Hellems J, Huggett J, Kubista M, Mueller R, Nolan T, Pfaffl MW, Shipley GL, Vandesompele J, Wittwer CT. The MIQE guidelines: minimum information for publication of quantitative real-time PCR experiments. *Clin Chem*. 2009;55:611-622.

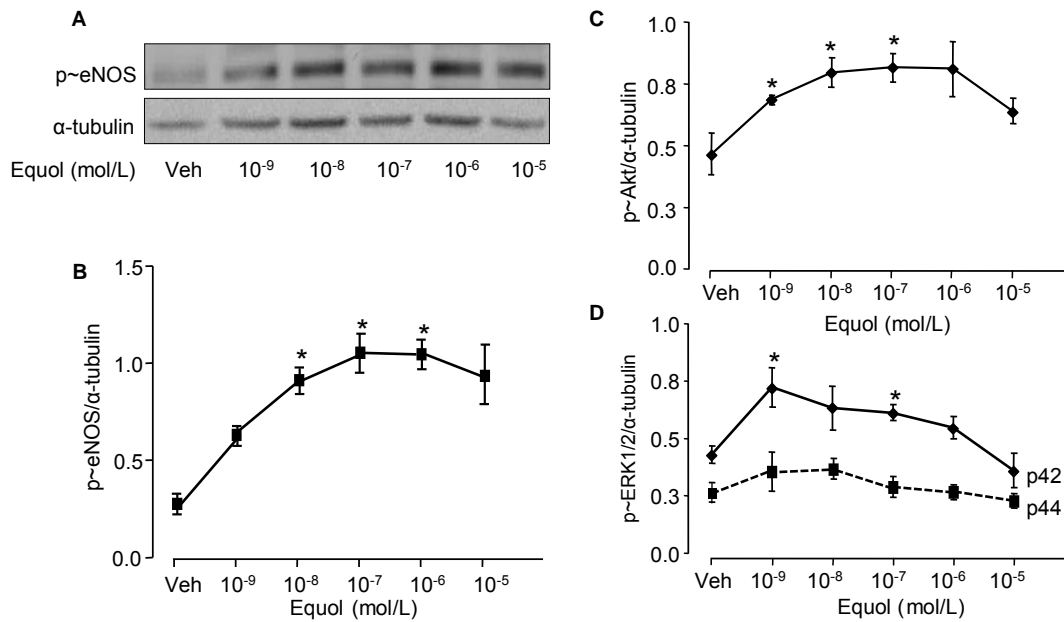

**Figure S1.** Concentration-dependent activation of eNOS and upstream kinases by the isoflavone equol. HUVEC were equilibrated in low serum (1% FCS) M199 for 4 h and then incubated in Krebs buffer containing L-arginine (100 μmol/L) and stimulated for 2 min with equol (10<sup>-9</sup>–10<sup>-5</sup> M) or vehicle (Veh, 0.01% DMSO). Cell lysates were immunoblotted for p~eNOS, p~Akt and p~ERK1/2. **(A)** Representative immunoblot of eNOS phosphorylation. **(B–D)** Densitometric analyses of p~eNOS, p~Akt and p~ERK1/2 in HUVEC stimulated acutely with equol vs. vehicle. Mean ± S.E.M. of values in cultures from 3-4 different donors, \*P<0.05 relative to vehicle.

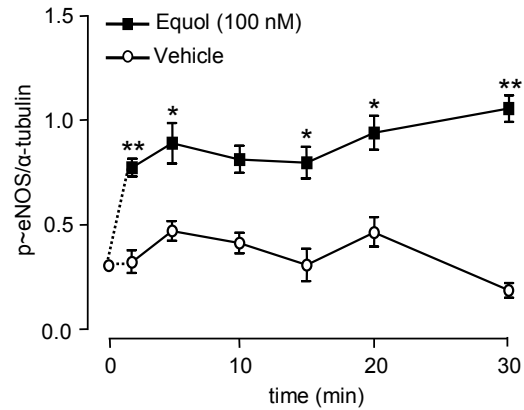

**Figure S2.** Time-dependent activation of eNOS phosphorylation by the isoflavone equol. HUVEC were equilibrated in low serum (1% FCS) M199 for 4 h and then incubated in Krebs buffer containing L-arginine (100  $\mu\text{mol/L}$ ) and stimulated for 2 – 30 min with equol (100 nmol/L) or vehicle (Veh, 0.01% DMSO). Cell lysates were immunoblotted for phosphorylated eNOS-Ser1177 and analyzed by densitometry relative to  $\alpha$ -tubulin. Mean  $\pm$  S.E.M. of values in cultures from 3-4 different donors, \* $P$ <0.05, \*\* $P$ <0.01 relative to vehicle.

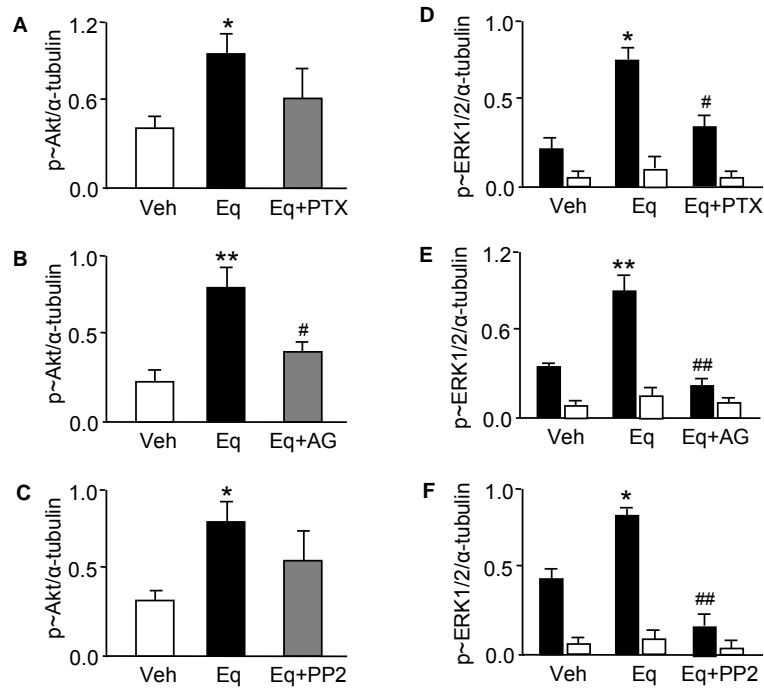

**Figure S3.** Densitometric analysis of equol stimulated Akt and ERK1/2 phosphorylation in fetal endothelial cells - effects of inhibitors of G-proteins, EGFR kinase and c-Src kinase. HUVEC were pre-equilibrated in low serum (1% FCS) M199 for 4 h and then pre-incubated for 30 min with the G-protein inhibitor (pertussis toxin, PTX, 100 ng/mL), EGFR kinase inhibitor (AG-1478, AG, 5  $\mu$ mol/L) or Src kinase inhibitor (PP2, 10  $\mu$ mol/L) prior to acute stimulation with equol (Eq 100 nmol/L) for 2 min in the absence or presence the inhibitors. Membranes were immunoblotted for p~Akt (panels A-C) and p~ERK1/2 (panels D-F) vs.  $\alpha$ -tubulin. Mean  $\pm$  S.E.M of measurements in different cell cultures obtained from 4 different donors, \* $P$ <0.05,  $P$ <0.01 vs. vehicle (Veh, 0.01% DMSO) and # $P$ <0.05, ## $P$ <0.01 vs. equol in the absence of inhibitors.

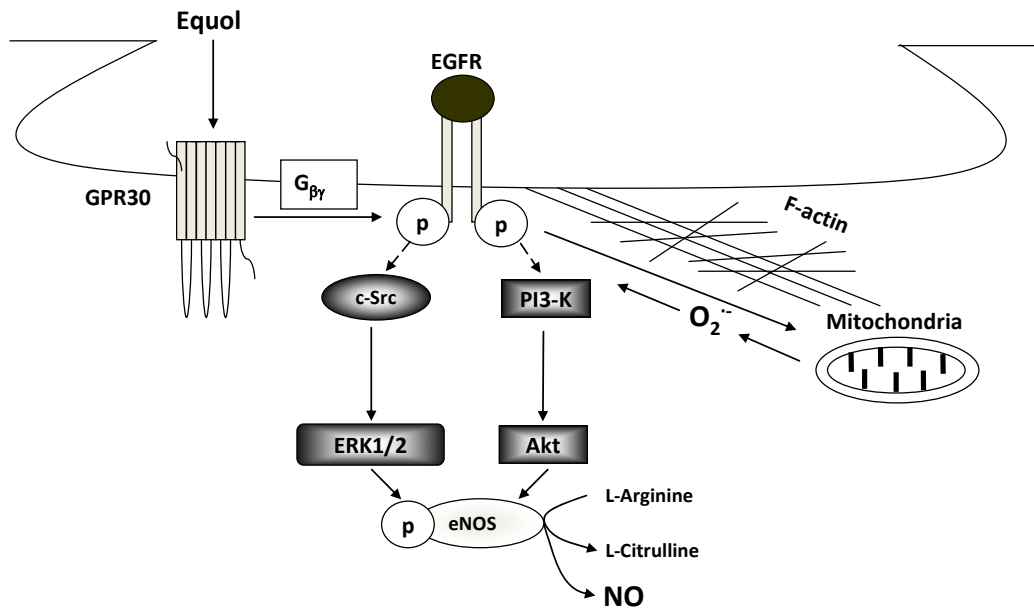

**Figure S4.** Proposed mechanisms underlying acute activation of eNOS by equol and other dietary isoflavones. Equol and other dietary isoflavones stimulate kinase activation and subsequent eNOS phosphorylation and NO production via mitochondria-derived ROS. Kinase activation may be dependent on GPR30/epidermal growth factor receptor (EGFR) transactivation as previously described.<sup>21,24</sup> EGFR activation leads to ERK1/2 activation via c-Src and mitochondrial-ROS potentiated Akt activation via PI-3K. Notably, inhibition of mitochondrial ROS generation with rotenone or depolymerization of F-actin abrogates equol stimulated activation of Akt, eNOS and NO production in human endothelial cells.

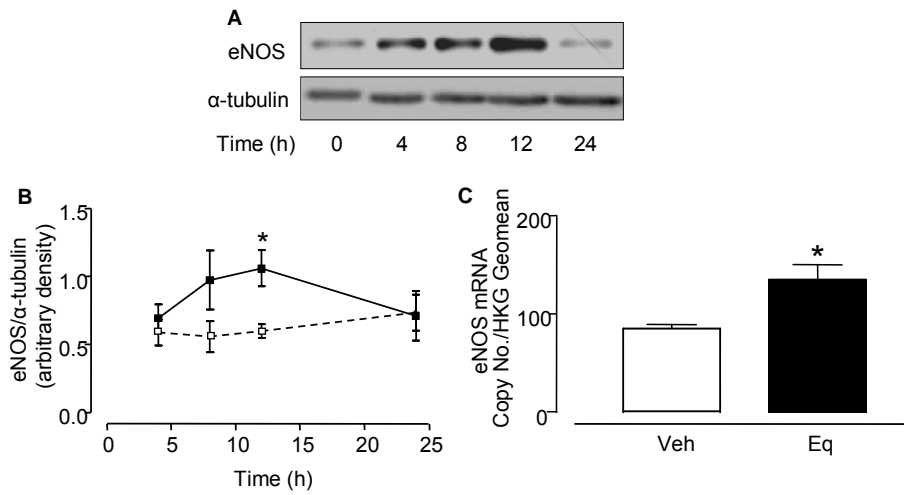

**Figure S5.** Equol upregulates eNOS protein and mRNA expression in fetal endothelial cells. HUVEC were pre-incubated in low serum (1% FCS) M199 for 4 h and then treated with M199 (1% FCS) containing equol (Eq, 100 nmol/L) or vehicle (Veh, 0.01% DMSO) for 4 – 24 h. **(A-B)**, effects of equol on eNOS protein expression in a representative immunoblot and densitometric analysis of eNOS/ $\alpha$ -tubulin ratio. **(C)** eNOS mRNA expression after 6 h treatment with equol (Eq, 100 nmol/L, filled squares) vs. vehicle (Veh, 0.01% DMSO, unfilled squares), expressed as mean copy number relative to the Geomean of three house-keeper genes (see Supplemental Materials and Methods). Means  $\pm$  S.E.M., n = 5-6 different cell cultures from 5-6 different donors, \* $P$ <0.05, vs. vehicle.
